# Supplementary figures and images for: Modeling of a Novel Patient-Based MYO5B Point Mutation Reveals Insights Into MVID Pathogenesis
Source: PubMed Central journal article supplement — Cell Mol Gastroenterol Hepatol. 2022 Dec 31;15(4):1022–6. doi: 10.1016/j.jcmgh.2022.12.015 (PMC10041088; doi:10.1016/j.jcmgh.2022.12.015), 2022-12-31

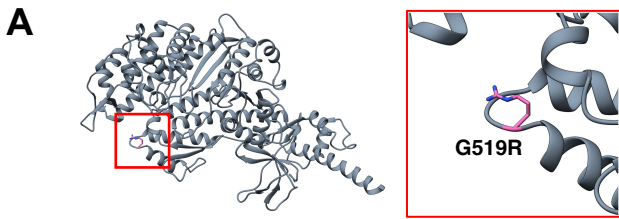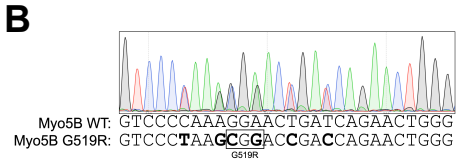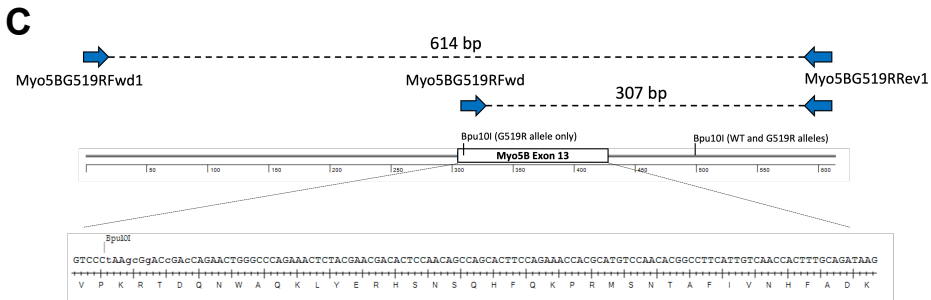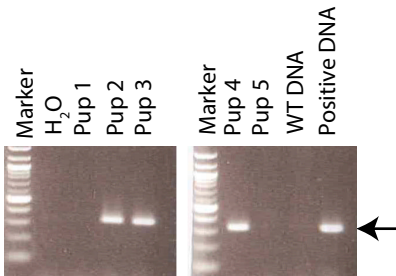

Supplement: mmc2.pdf [file mmc2.pdf]

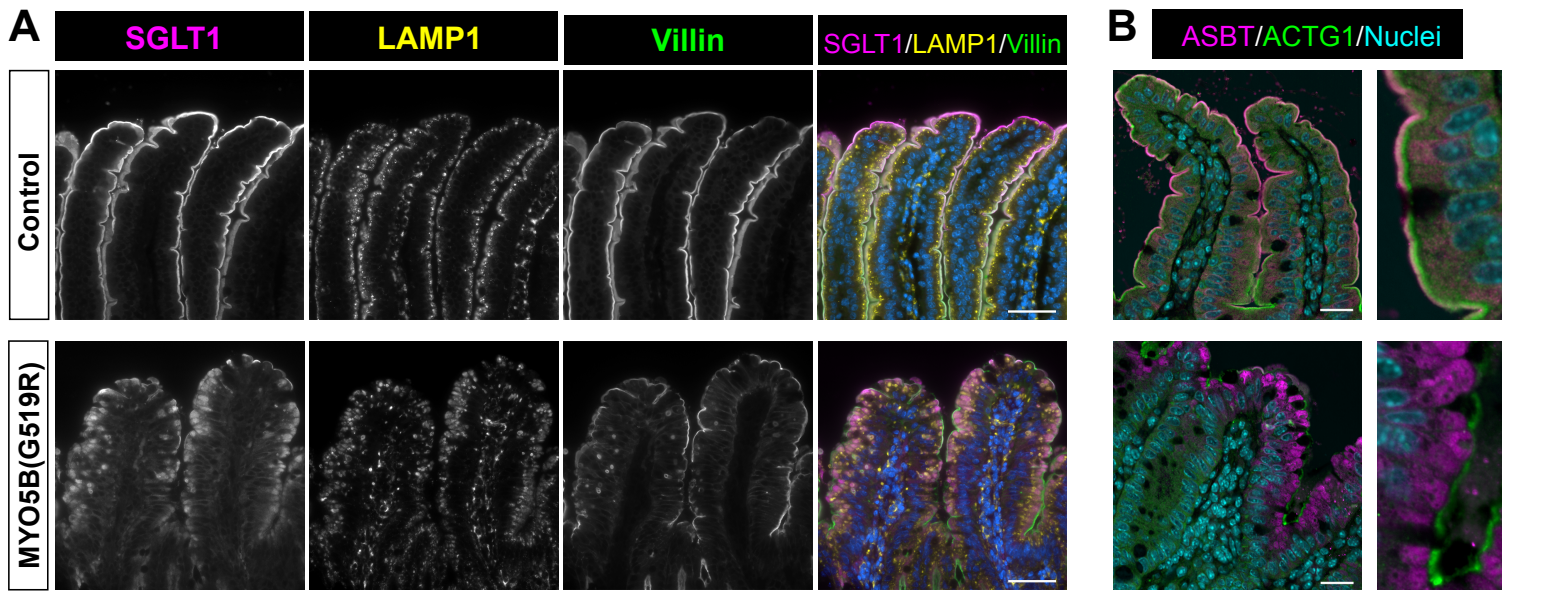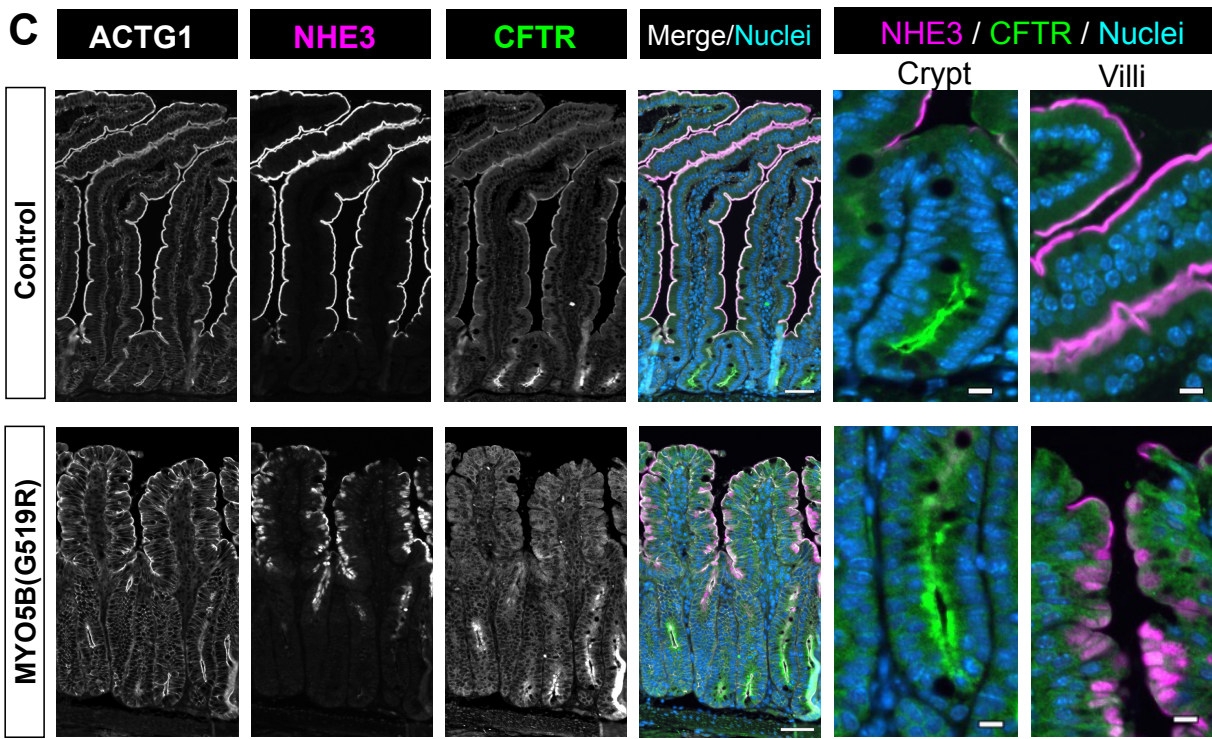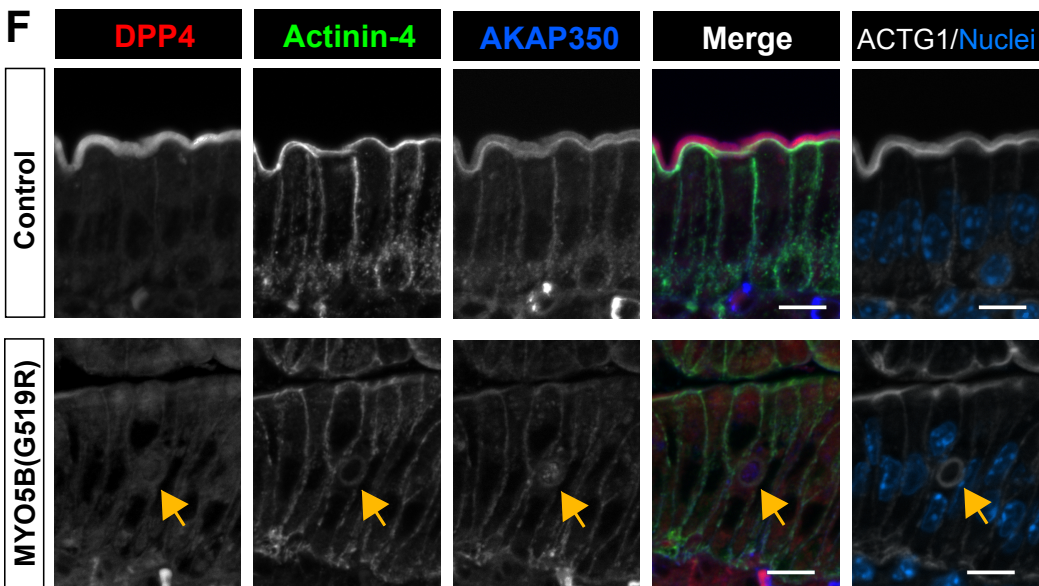

Supplement: mmc3.pdf [file mmc3.pdf]

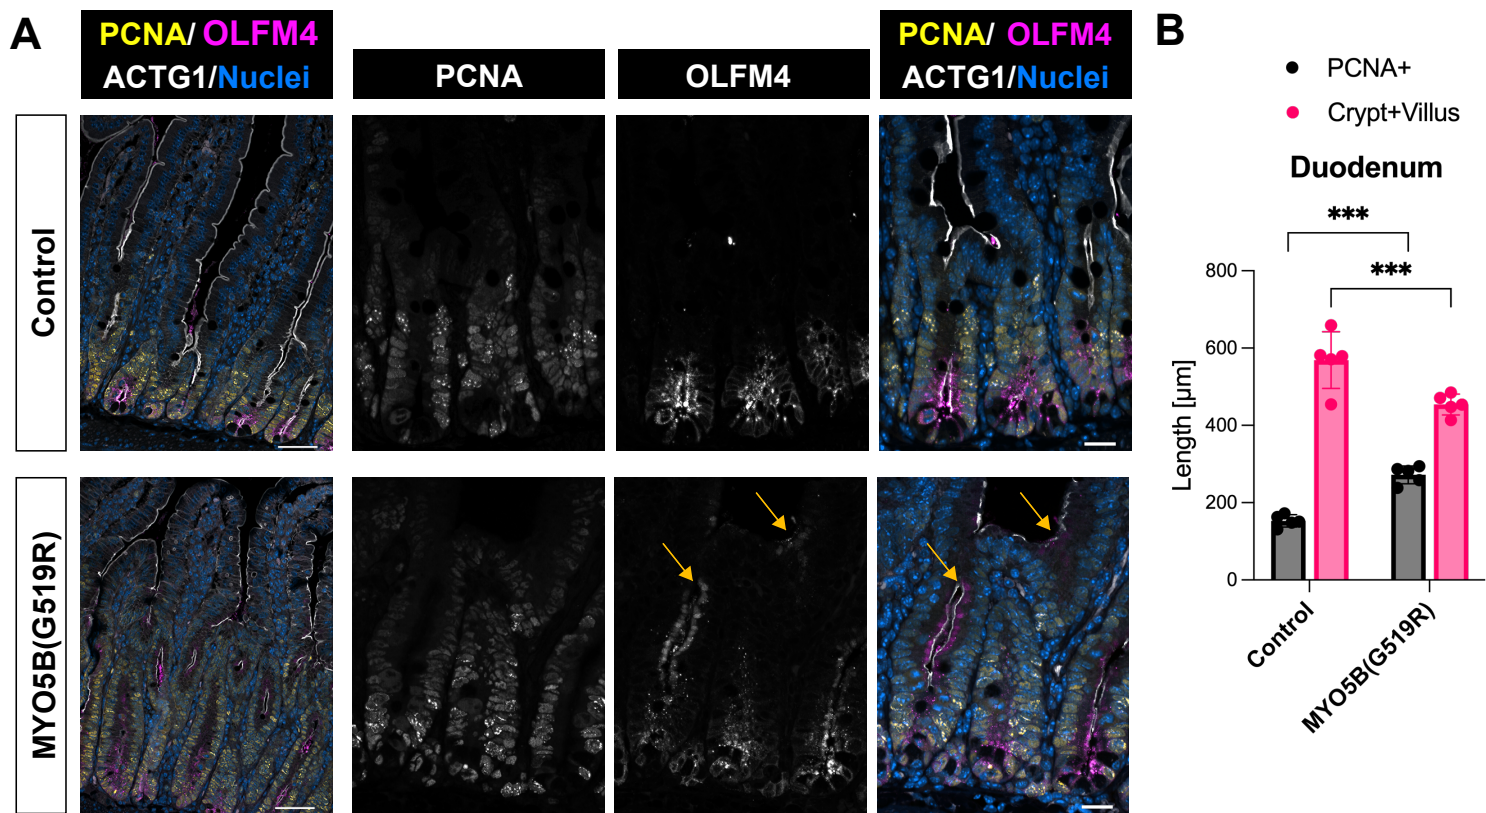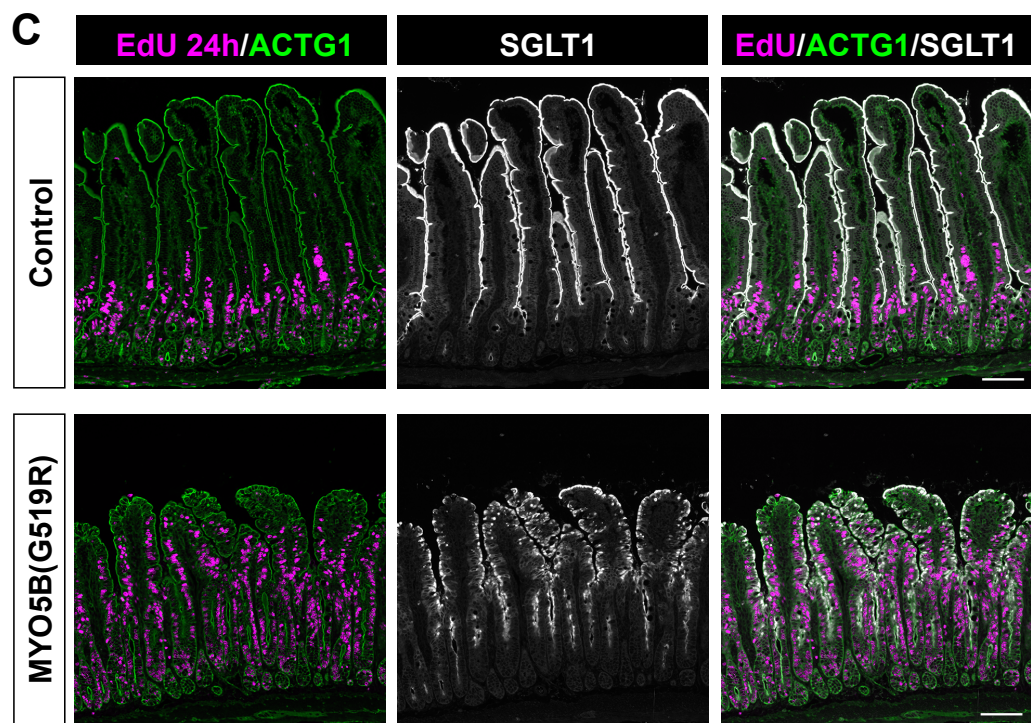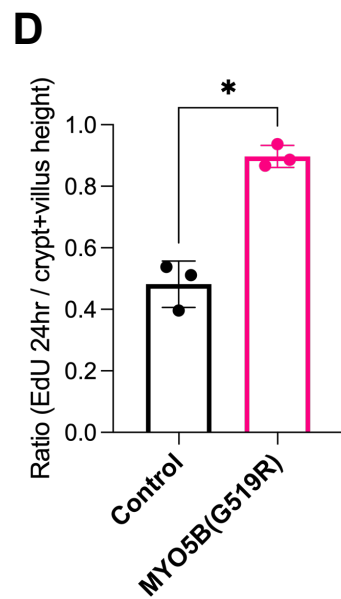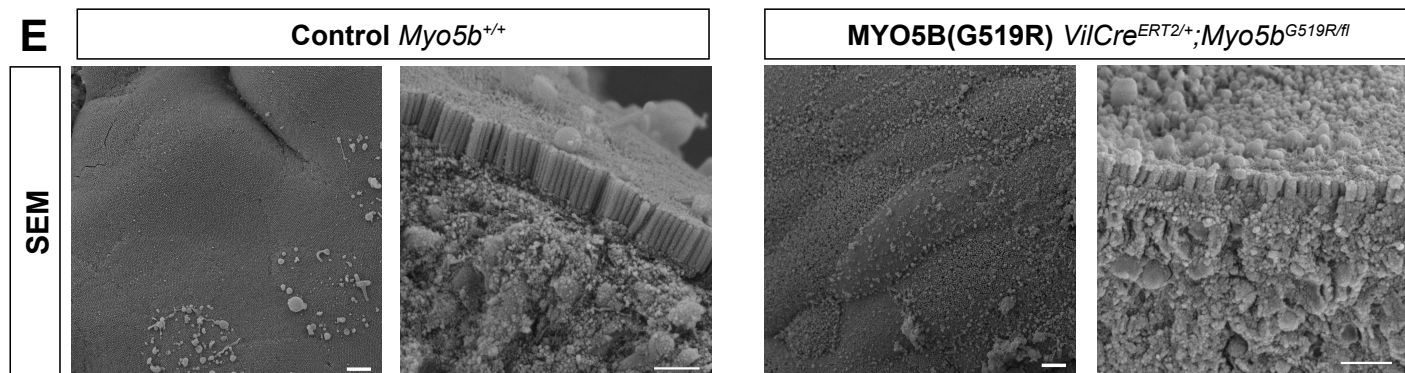

Supplement: mmc4.pdf [file mmc4.pdf]
